# Supplementary material for: Grapevine pruning time affects natural wound colonization by wood-invading fungi
Source: bioRxiv or medRxiv preprint supplement (doi:10.1101/2020.04.20.050955), 2020-04-21

**Table S1**

Main characteristics of the six vineyards used in this study.

|                           | Vineyard-1                  | Vineyard-2                  | Vineyard-3                  | Vineyard-4                  | Vineyard-5                  | Vineyard-6                  |
|---------------------------|-----------------------------|-----------------------------|-----------------------------|-----------------------------|-----------------------------|-----------------------------|
| Coordinates               | 42°26'06.8"N<br>7°00'19.3"W | 42°25'37.5"N<br>7°00'18.3"W | 42°21'44.2"N<br>8°06'56.5"W | 42°21'34.4"N<br>8°07'09.5"W | 42°31'22.1"N<br>8°44'33.7"W | 42°31'22.8"N<br>8°44'31.9"W |
| Location                  | O Barco de<br>Valdeorras    | O Barco de<br>Valdeorras    | Leiro                       | Leiro                       | Ribadumia                   | Ribadumia                   |
| Province                  | Ourense                     | Ourense                     | Ourense                     | Ourense                     | Pontevedra                  | Pontevedra                  |
| Denomination of<br>Origin | Valdeorras                  | Valdeorras                  | Ribeiro                     | Ribeiro                     | Rías Baixas                 | Rías Baixas                 |
| Age                       | 37                          | 29                          | 13                          | 25                          | 13                          | 19                          |
| Rootstock                 | 110 Richter                 | 110 Richter                 | 196-17 Castel               | 196-17 Castel               | 196-17 Castel               | 196-17 Castel               |
| Cultivar                  | Godello                     | Godello                     | Mencia                      | Mencia                      | Albariño                    | Albariño                    |

**Table S2**

Estimates of number of reads, sample coverage and diversity indices at the genus level for fungal profiles.

| Sample ID* | Number of reads | Good's coverage (%) | Chao1 richness | Shannon diversity |
|------------|-----------------|---------------------|----------------|-------------------|
| VA1        | 30997           | 99.99               | 14             | 0.82              |
| VA2        | 37265           | 99.91               | 13             | 0.80              |
| VA3        | 32082           | 99.25               | 13             | 0.89              |
| VA4        | 55980           | 99.90               | 10             | 0.77              |
| VA5        | 57752           | 100                 | 12             | 0.92              |
| VA6        | 44741           | 99.99               | 18             | 1.52              |
| VA7        | 75471           | 99.26               | 17             | 1.18              |
| VA8        | 102463          | 99.99               | 21             | 1.75              |
| VA9        | 85422           | 99.99               | 26             | 1.95              |
| VA10       | 110137          | 99.99               | 22             | 1.49              |
| VA11       | 157989          | 99.97               | 21             | 1.39              |
| VA12       | 151246          | 99.99               | 22             | 1.54              |
| VA13       | 144063          | 99.29               | 21             | 1.79              |
| VA14       | 112761          | 99.98               | 22             | 1.79              |
| VA15       | 126625          | 99.98               | 23             | 1.82              |
| VB1        | 21438           | 99.99               | 9              | 0.72              |
| VB2        | 42497           | 99.99               | 11             | 0.75              |
| VB3        | 29866           | 99.99               | 11             | 0.67              |
| VB4        | 52414           | 99.99               | 12             | 0.77              |

|      |        |       |    |      |
|------|--------|-------|----|------|
| VB5  | 38232  | 99.37 | 11 | 0.69 |
| VB6  | 81483  | 99.99 | 17 | 1.82 |
| VB7  | 85432  | 99.42 | 17 | 1.49 |
| VB8  | 100993 | 99.99 | 17 | 1.40 |
| VB9  | 73418  | 99.99 | 15 | 1.44 |
| VB10 | 142701 | 99.99 | 19 | 1.76 |
| VB11 | 153446 | 99.88 | 18 | 1.36 |
| VB12 | 102367 | 99.98 | 15 | 1.35 |
| VB13 | 126372 | 99.99 | 13 | 1.45 |
| VB14 | 98737  | 99.97 | 16 | 1.26 |
| VB15 | 143041 | 99.96 | 15 | 1.59 |
| EA1  | 34336  | 99.97 | 16 | 1.39 |
| EA2  | 47911  | 99.91 | 16 | 1.15 |
| EA3  | 60592  | 99.99 | 14 | 1.08 |
| EA4  | 39445  | 99.98 | 13 | 0.96 |
| EA5  | 30599  | 99.95 | 12 | 1.41 |
| EA6  | 30950  | 99.98 | 13 | 1.40 |
| EA7  | 91545  | 99.43 | 13 | 1.62 |
| EA8  | 35994  | 99.55 | 13 | 1.62 |
| EA9  | 53704  | 99.90 | 13 | 1.82 |
| EA10 | 77680  | 100   | 16 | 2.03 |
| EA11 | 78617  | 99.99 | 16 | 1.80 |

|      |        |       |    |      |
|------|--------|-------|----|------|
| EA12 | 110987 | 99.71 | 18 | 2.14 |
| EA13 | 110881 | 99.98 | 22 | 2.27 |
| EA14 | 113505 | 99.77 | 22 | 1.95 |
| EA15 | 120807 | 99.97 | 22 | 2.13 |
| EB1  | 30916  | 99.98 | 18 | 1.34 |
| EB2  | 44533  | 99.98 | 18 | 1.25 |
| EB3  | 65869  | 99.29 | 19 | 1.77 |
| EB4  | 57978  | 99.53 | 15 | 1.48 |
| EB5  | 62357  | 99.99 | 18 | 1.58 |
| EB6  | 49423  | 99.92 | 19 | 1.94 |
| EB7  | 62882  | 99.45 | 17 | 1.71 |
| EB8  | 39264  | 99.61 | 18 | 1.99 |
| EB9  | 123476 | 99.99 | 22 | 2.23 |
| EB10 | 95639  | 99.99 | 21 | 2.24 |
| EB11 | 99738  | 99.97 | 25 | 1.87 |
| EB12 | 109848 | 99.83 | 23 | 2.04 |
| EB13 | 139663 | 99.98 | 25 | 2.13 |
| EB14 | 91304  | 99.99 | 19 | 1.67 |
| EB15 | 87918  | 99.99 | 20 | 1.78 |
| RBA1 | 78947  | 99.99 | 12 | 0.45 |
| RBA2 | 107572 | 99.99 | 14 | 0.53 |
| RBA3 | 74950  | 99.98 | 10 | 0.86 |

|       |        |       |    |      |
|-------|--------|-------|----|------|
| RBA4  | 122474 | 99.98 | 15 | 0.85 |
| RBA5  | 95505  | 99.99 | 14 | 0.73 |
| RBA6  | 92223  | 100   | 17 | 0.98 |
| RBA7  | 50186  | 100   | 16 | 0.62 |
| RBA8  | 72830  | 99.93 | 17 | 1.23 |
| RBA9  | 107543 | 99.91 | 23 | 1.08 |
| RBA10 | 92547  | 99.78 | 15 | 0.63 |
| RBA11 | 91007  | 99.34 | 26 | 2.19 |
| RBA12 | 101431 | 99.72 | 22 | 1.92 |
| RBA13 | 122762 | 99.98 | 17 | 1.67 |
| RBA14 | 95197  | 99.88 | 16 | 1.75 |
| RBA15 | 76690  | 99.99 | 20 | 2.03 |
| RBB1  | 73988  | 99.99 | 13 | 0.82 |
| RBB2  | 107288 | 99.98 | 12 | 0.42 |
| RBB3  | 37573  | 99.98 | 14 | 0.58 |
| RBB4  | 32966  | 99.98 | 11 | 0.70 |
| RBB5  | 100935 | 99.98 | 13 | 0.57 |
| RBB6  | 71106  | 99.99 | 17 | 1.14 |
| RBB7  | 102172 | 99.99 | 18 | 1.20 |
| RBB8  | 72704  | 99.99 | 17 | 1.23 |
| RBB9  | 60729  | 99.99 | 14 | 1.08 |
| RBB10 | 133564 | 100   | 18 | 1.39 |

|       |        |       |    |      |
|-------|--------|-------|----|------|
| RBB11 | 74115  | 99.99 | 23 | 2.06 |
| RBB12 | 71541  | 99.98 | 22 | 1.80 |
| RBB13 | 120200 | 100   | 17 | 1.65 |
| RBB14 | 95079  | 99.90 | 17 | 1.75 |
| RBB15 | 108127 | 99.99 | 18 | 1.88 |
| VA16  | 22135  | 99.98 | 8  | 0.89 |
| VA17  | 25774  | 99.98 | 10 | 0.75 |
| VA18  | 32272  | 99.99 | 11 | 0.80 |
| VA19  | 31106  | 99.99 | 18 | 1.24 |
| VA20  | 42558  | 99.99 | 14 | 1.12 |
| VA21  | 36801  | 99.99 | 20 | 1.52 |
| VA22  | 46534  | 99.98 | 18 | 0.91 |
| VA23  | 26136  | 99.98 | 19 | 1.48 |
| VA24  | 25613  | 99.98 | 14 | 1.33 |
| VA25  | 37975  | 99.83 | 18 | 1.59 |
| VA26  | 55837  | 99.72 | 21 | 1.47 |
| VA27  | 45041  | 99.85 | 22 | 1.75 |
| VA28  | 36321  | 99.79 | 20 | 1.43 |
| VA29  | 34329  | 99.56 | 23 | 1.86 |
| VA30  | 73180  | 99.97 | 21 | 1.63 |
| VB16  | 20896  | 99.96 | 9  | 0.73 |
| VB17  | 33556  | 99.98 | 10 | 1.05 |

|      |       |       |    |      |
|------|-------|-------|----|------|
| VB18 | 29260 | 99.98 | 8  | 0.63 |
| VB19 | 23805 | 99.98 | 5  | 0.63 |
| VB20 | 33390 | 100   | 8  | 0.93 |
| VB21 | 39692 | 99.99 | 17 | 1.39 |
| VB22 | 49296 | 99.99 | 17 | 1.07 |
| VB23 | 32440 | 99.98 | 21 | 1.63 |
| VB24 | 29700 | 99.98 | 14 | 1.29 |
| VB25 | 34674 | 99.98 | 14 | 1.20 |
| VB26 | 48616 | 99.98 | 16 | 1.36 |
| VB27 | 43326 | 99.98 | 17 | 1.52 |
| VB28 | 41102 | 99.99 | 16 | 1.37 |
| VB29 | 32632 | 99.95 | 12 | 1.31 |
| VB30 | 65962 | 99.90 | 15 | 1.44 |
| EA16 | 30996 | 99.99 | 9  | 1.23 |
| EA17 | 26365 | 99.99 | 11 | 0.81 |
| EA18 | 30523 | 99.99 | 15 | 1.53 |
| EA19 | 24200 | 99.98 | 13 | 1.22 |
| EA20 | 32822 | 99.81 | 16 | 1.44 |
| EA21 | 34981 | 99.78 | 20 | 1.58 |
| EA22 | 37116 | 100   | 18 | 1.96 |
| EA23 | 34795 | 99.99 | 18 | 1.48 |
| EA24 | 41678 | 99.98 | 17 | 1.76 |

|       |       |       |    |      |
|-------|-------|-------|----|------|
| EA25  | 42096 | 99.99 | 21 | 1.97 |
| EA26  | 42101 | 99.90 | 21 | 1.88 |
| EA27  | 43259 | 99.93 | 20 | 1.81 |
| EA28  | 48662 | 99.93 | 25 | 2.06 |
| EA29  | 46391 | 99.93 | 20 | 2.14 |
| EA30  | 35451 | 99.96 | 16 | 2.01 |
| EB16  | 25525 | 99.98 | 16 | 1.44 |
| EB17  | 38998 | 99.98 | 17 | 2.04 |
| EB18  | 38530 | 99.98 | 17 | 1.84 |
| EB19  | 22581 | 100   | 14 | 1.52 |
| EB20  | 36746 | 99.99 | 19 | 1.64 |
| EB21  | 46211 | 99.89 | 17 | 2.11 |
| EB22  | 44363 | 99.91 | 17 | 2.07 |
| EB23  | 46907 | 99.99 | 12 | 1.90 |
| EB24  | 62412 | 99.99 | 14 | 1.76 |
| EB25  | 45877 | 99.99 | 15 | 1.52 |
| EB26  | 29742 | 99.97 | 11 | 1.40 |
| EB27  | 39639 | 99.90 | 16 | 1.57 |
| EB28  | 23434 | 99.93 | 14 | 1.81 |
| EB29  | 43869 | 100   | 13 | 1.24 |
| EB30  | 45514 | 100   | 17 | 1.07 |
| RBA16 | 31241 | 99.56 | 14 | 0.56 |



|       |       |       |    |      |
|-------|-------|-------|----|------|
| RBA17 | 40820 | 99.91 | 9  | 0.32 |
| RBA18 | 21700 | 99.99 | 5  | 0.31 |
| RBA19 | 30113 | 99.66 | 9  | 0.67 |
| RBA20 | 42209 | 99.61 | 12 | 0.55 |
| RBA21 | 32981 | 99.45 | 13 | 0.88 |
| RBA22 | 36942 | 99.78 | 15 | 0.82 |
| RBA23 | 30676 | 99.61 | 14 | 0.92 |
| RBA24 | 32895 | 99.67 | 12 | 0.56 |
| RBA25 | 42133 | 99.45 | 16 | 1.01 |
| RBA26 | 23946 | 99.48 | 18 | 1.12 |
| RBA27 | 30540 | 99.40 | 19 | 1.42 |
| RBA28 | 33873 | 99.39 | 14 | 1.23 |
| RBA29 | 35837 | 99.54 | 15 | 1.37 |
| RBA30 | 45960 | 99.32 | 18 | 1.64 |
| RBB16 | 35758 | 99.81 | 10 | 0.36 |
| RBB17 | 27059 | 99.34 | 10 | 0.44 |
| RBB18 | 25019 | 99.48 | 11 | 0.62 |
| RBB19 | 28702 | 99.88 | 10 | 0.40 |
| RBB20 | 42310 | 99.90 | 13 | 0.57 |
| RBB21 | 38842 | 99.28 | 15 | 1.02 |
| RBB22 | 40254 | 99.32 | 14 | 0.78 |
| RBB23 | 36802 | 99.56 | 14 | 0.84 |

|       |       |       |    |      |
|-------|-------|-------|----|------|
| RBB24 | 38137 | 99.98 | 16 | 1.03 |
| RBB25 | 33501 | 99.98 | 16 | 0.77 |
| RBB26 | 34645 | 100   | 21 | 2.06 |
| RBB27 | 21287 | 99.99 | 14 | 1.77 |
| RBB28 | 32235 | 99.81 | 12 | 1.26 |
| RBB29 | 35528 | 99.94 | 16 | 1.47 |
| RBB30 | 27240 | 99.98 | 16 | 1.25 |

\*VA: D.O. Valdeorras; EA: D.O. Ribeiro; RB: D.O. Rias Baixas.

**Table S3**

OTUs that were unique in both infection periods for each D.O.

| D.O. Ribeiro               |                              | D.O. Rias Baixas        |                                | D.O. Valdeorras            |                                |
|----------------------------|------------------------------|-------------------------|--------------------------------|----------------------------|--------------------------------|
| Nov-Feb                    | Feb-May                      | Nov-Feb                 | Feb-May                        | Nov-Feb                    | Feb-May                        |
| Unknown                    | <i>Arthrinium</i>            | <i>Aleurobotrys</i>     | <i>Bannozya</i>                | <i>Acremonium</i>          | <i>Apiognomonia</i>            |
| <i>Pleosporaceae</i>       | <i>Aspergillus</i>           | <i>Bensingtonia</i>     | <i>Botryosphaeria</i>          | <i>Apiognomonia</i>        | <i>Bloxamia</i>                |
| <i>Athelia</i>             | Unknown <i>Heliotaceae</i>   | <i>Boeremia</i>         | <i>Bulleromyces</i>            | <i>Apiotrichum</i>         | <i>Botryosphaeria</i>          |
| <i>Bensingtonia</i>        | <i>Ceratobasidium</i>        | <i>Camptophora</i>      | <i>Coniosporium</i>            | <i>Athelia</i>             | Unknown <i>Heliales</i>        |
| <i>Colletotrichum</i>      | <i>Coniosporium</i>          | <i>Clavaria</i>         | <i>Coniothyrium</i>            | <i>Boeremia</i>            | <i>Candida</i>                 |
| <i>Conlarium</i>           | <i>Cryptodiaporthe</i>       | <i>Colacogloea</i>      | <i>Constantinomyces</i>        | <i>Buckleyzyma</i>         | <i>Coniozyma</i>               |
| <i>Craterellus</i>         | <i>Cyclothyrium</i>          | <i>Eucasphaeria</i>     | <i>Cryptodiaporthe</i>         | <i>Ceratobasidium</i>      | <i>Constantinomyces</i>        |
| <i>Cyanodermella</i>       | <i>Dendrothyrium</i>         | <i>Glomus</i>           | <i>Cryptosporiopsis</i>        | <i>Curvularia</i>          | <i>Cryptodiaporthe</i>         |
| <i>Devriesia</i>           | <i>Devriesia</i>             | <i>Krasilnikovozyma</i> | <i>Cyanodermella</i>           | <i>Eucasphaeria</i>        | <i>Cryptovalsa</i>             |
| <i>Dioszegia</i>           | Unknown <i>Gnomoniaceae</i>  | <i>Malassezia</i>       | Unknown <i>Orbiliaceae</i>     | <i>Exobasidium</i>         | <i>Dendrophoma</i>             |
| <i>Deroxomyces</i>         | <i>Fellozyma</i>             | <i>Metschnikowia</i>    | Unknown <i>Gnomoniaceae</i>    | <i>Exophiala</i>           | <i>Devriesia</i>               |
| <i>Erythrobasidium</i>     | Unknown <i>Tremellales</i>   | <i>Penicillium</i>      | <i>Deroxomyces</i>             | <i>Flagelloscypha</i>      | Unknown                        |
| <i>Eucasphaeria</i>        | <i>Keissleriella</i>         | <i>Phaeotremella</i>    | <i>Eutypa</i>                  | <i>Heterocephalacria</i>   | <i>Gnomoniaceae</i>            |
| <i>Exobasidium</i>         | <i>Kwoniella</i>             | <i>Phialophora</i>      | <i>Exophiala</i>               | <i>Krasilnikovozyma</i>    | Unknown <i>Dothideomycetes</i> |
| <i>Flagelloscypha</i>      | <i>Lachnella</i>             | <i>Piskurozyma</i>      | <i>Flagelloscypha</i>          | Unknown <i>Nectriaceae</i> | <i>Endoconidioma</i>           |
| <i>Kondoa</i>              | Unknown <i>Pleosporaceae</i> | <i>Reddellomyces</i>    | Unknown <i>Physalacriaceae</i> | <i>Microdochium</i>        | Unknown                        |
| <i>Lachancea</i>           | <i>Lophiotrema</i>           | <i>Sampaiozyma</i>      | <i>Fonsecazyma</i>             | <i>Microstroma</i>         | <i>Physalacriaceae</i>         |
| <i>Lecanicillium</i>       | <i>Mulderomyces</i>          | <i>Septoriella</i>      | <i>Herpotrichia</i>            | <i>Murilentithecium</i>    | <i>Gnomoniopsis</i>            |
| Unknown <i>Nectriaceae</i> | <i>Neofusicoccum</i>         | <i>Sporidiobolales</i>  | <i>Hyalotiella</i>             | <i>Neophaeocryptopus</i>   | <i>Hyalotiella</i>             |
| <i>Neocucurbitaria</i>     | <i>Papiliotrema</i>          | <i>Strigula</i>         | <i>Hypocreales</i>             | <i>Niesslia</i>            | <i>Italica</i>                 |
| <i>Neophaeocryptopus</i>   | <i>Plagiostoma</i>           |                         | <i>Hypsotheca</i>              | <i>Penicillium</i>         | <i>Kalmusia</i>                |
| <i>Penicillium</i>         | <i>Raffaelea</i>             |                         | <i>Lachancea</i>               | <i>Periconia</i>           | <i>Lanzia</i>                  |
| <i>Phaeococcomyces</i>     | Unknown                      |                         | <i>Lanzia</i>                  | <i>Phlyctema</i>           | Unknown                        |
| <i>Phialophora</i>         | <i>Phanerochaetaceae</i>     |                         | <i>Lasionectria</i>            | <i>Piskurozyma</i>         | <i>Cystobasidiomycetes</i>     |
| <i>Pleospora</i>           |                              |                         | Unknown <i>Pleosporaceae</i>   | <i>Pithomyces</i>          | <i>Neofusicoccum</i>           |
| <i>Pseudohyphozyma</i>     |                              |                         | <i>Leucosporidium</i>          | <i>Praetumpfia</i>         | <i>Neosetophoma</i>            |
| <i>Sarocladium</i>         |                              |                         | <i>Lewia</i>                   | <i>Rhizopus</i>            | Unknown                        |
| <i>Seimatosporium</i>      |                              |                         | Unknown <i>Niaceae</i>         | <i>Septoriella</i>         | <i>Pleosporales</i>            |
| <i>Stagonospora</i>        |                              |                         | <i>Microdochium</i>            | <i>Sporobolomyces</i>      | <i>Papiliotrema</i>            |

|                                                                                       |  |  |                                                                                                                                                                                                                                                                                                                                                                                                                                         |                                                                                                                                                          |                                                                                                                                                                                       |
|---------------------------------------------------------------------------------------|--|--|-----------------------------------------------------------------------------------------------------------------------------------------------------------------------------------------------------------------------------------------------------------------------------------------------------------------------------------------------------------------------------------------------------------------------------------------|----------------------------------------------------------------------------------------------------------------------------------------------------------|---------------------------------------------------------------------------------------------------------------------------------------------------------------------------------------|
| <p><i>Sterigmatomyces</i><br/> <i>Tygervalleyomyces</i><br/> <i>Xenoramularia</i></p> |  |  | <p><i>Mucor</i><br/> <i>unknownganishia</i><br/> <i>Neoacrodontiella</i><br/> <i>Neocucurbitaria</i><br/> <i>Niesslia</i><br/> <i>Periconia</i><br/> <i>Phaeococcomyces</i><br/> <i>Powellomyces</i><br/> <i>Pyrenophora</i><br/> <i>Rachicladosporium</i><br/> <i>Rhizopus</i><br/> <i>Sclerostagnospora</i><br/> <i>Seiridium</i><br/> <i>Setophaeosphaeria</i><br/> <i>Sydowia</i><br/> <i>Syncephalis</i><br/> <i>Xylopsora</i></p> | <p><i>Sugiyamaella</i><br/> <i>Tetracladium</i><br/> <i>Tremellomycetes</i><br/> <i>Triposporium</i><br/> <i>Vestigium</i><br/> <i>Xenoramularia</i></p> | <p><i>Pleospora</i><br/> <i>Reddellomyces</i><br/> <i>Rhexocercosporidium</i><br/> <i>Rhizoscyphus</i><br/> <i>Sphaceloma</i><br/> <i>Sterigmatomyces</i><br/> <i>Syncephalis</i></p> |
|---------------------------------------------------------------------------------------|--|--|-----------------------------------------------------------------------------------------------------------------------------------------------------------------------------------------------------------------------------------------------------------------------------------------------------------------------------------------------------------------------------------------------------------------------------------------|----------------------------------------------------------------------------------------------------------------------------------------------------------|---------------------------------------------------------------------------------------------------------------------------------------------------------------------------------------|

**Table S4**

Mean values of temperature and relative humidity, and accumulated rainfall values at 1, 2 and 3 periods in each experimental season (winter: infection period Nov-Feb or spring: infection period Feb-May) for the two years of assay (2017/2018 and 2018/2019), in the three locations studied: (A) D.O. Ribeiro (Ourense), (B) D.O. Rías Baixas (Pontevedra), and (C) D.O. Valdeorras (Ourense).

| <b>A</b>                         |        |      |                       |                            |                           |
|----------------------------------|--------|------|-----------------------|----------------------------|---------------------------|
| <b>D.O. RIBEIRO</b>              |        |      |                       |                            |                           |
| Season                           | Period | Days | Mean temperature (°C) | Mean relative humidity (%) | Accumulated rainfall (mm) |
| Winter 2017/18                   | 1      | 30   | 5.90                  | 89.93                      | 171.60                    |
|                                  | 2      | 30   | 7.77                  | 89.80                      | 125.60                    |
|                                  | 3      | 18   | 6.64                  | 86.67                      | 25.00                     |
| Winter 2017/18 totals            |        | 78   | 6.79                  | 89.13                      | 322.20                    |
| Winter 2018/19                   | 1      | 30   | 10.15                 | 89.03                      | 107.40                    |
|                                  | 2      | 30   | 5.51                  | 90.23                      | 81.60                     |
|                                  | 3      | 40   | 6.87                  | 86.20                      | 105.40                    |
| Winter 2018/19 totals            |        | 104  | 7.44                  | 88.26                      | 294.40                    |
| <b>Winter totals (all years)</b> |        |      | <b>7.12</b>           | <b>88.69</b>               | <b>308.30</b>             |
| Spring 2018                      | 1      | 30   | 6.96                  | 83.23                      | 180.60                    |
|                                  | 2      | 30   | 9.45                  | 81.43                      | 284.00                    |
|                                  | 3      | 39   | 13.95                 | 71.08                      | 62.60                     |
| Spring 2018 totals               |        | 99   | 10.47                 | 77.90                      | 527.20                    |
| Spring 2019                      | 1      | 30   | 10.24                 | 76.60                      | 88.80                     |
|                                  | 2      | 30   | 11.80                 | 73.47                      | 119.60                    |
|                                  | 3      | 31   | 14.75                 | 70.10                      | 59.20                     |
| Spring 2019 totals               |        | 91   | 12.29                 | 73.35                      | 267.60                    |
| <b>Spring totals (all years)</b> |        |      | <b>11.38</b>          | <b>75.63</b>               | <b>397.40</b>             |
| <b>B</b>                         |        |      |                       |                            |                           |
| <b>D.O. RÍAS BAIXAS</b>          |        |      |                       |                            |                           |
| Season                           | Period | Days | Mean temperature (°C) | Mean relative humidity (%) | Accumulated rainfall (mm) |
| Winter 2017/18                   | 1      | 30   | 8.66                  | 84.40                      | 173.60                    |
|                                  | 2      | 30   | 10.57                 | 88.93                      | 206.20                    |
|                                  | 3      | 10   | 8.25                  | 81.90                      | 13.50                     |
| Winter 2017/18 totals            |        | 70   | 9.42                  | 85.99                      | 393.30                    |
| Winter 2018/19                   | 1      | 30   | 11.60                 | 88.00                      | 243.40                    |
|                                  | 2      | 30   | 9.38                  | 79.67                      | 34.40                     |
|                                  | 3      | 35   | 9.74                  | 83.03                      | 161.30                    |
| Winter 2018/19 totals            |        | 95   | 10.22                 | 83.54                      | 439.10                    |
| <b>Winter totals (all years)</b> |        |      | <b>9.82</b>           | <b>84.76</b>               | <b>416.20</b>             |
| Spring 2018                      | 1      | 30   | 8.85                  | 77.97                      | 200.20                    |
|                                  | 2      | 30   | 10.38                 | 80.17                      | 218.10                    |
|                                  | 3      | 39   | 13.20                 | 77.44                      | 143.20                    |
| Spring 2018 totals               |        | 99   | 11.03                 | 78.42                      | 561.50                    |

|                                  |   |    |              |              |               |
|----------------------------------|---|----|--------------|--------------|---------------|
| Spring 2019                      | 1 | 30 | 11.71        | 76.37        | 83.60         |
|                                  | 2 | 30 | 13.14        | 70.77        | 173.70        |
|                                  | 3 | 31 | 14.61        | 73.87        | 87.10         |
| Spring 2019 totals               |   | 91 | 13.17        | 73.67        | 344.40        |
| <b>Spring totals (all years)</b> |   |    | <b>12.10</b> | <b>76.05</b> | <b>452.95</b> |

**C**

**D.O. VALDEORRAS**

| Season                           | Period | Days | Mean temperature (°C) | Mean relative humidity (%) | Accumulated rainfall (mm) |
|----------------------------------|--------|------|-----------------------|----------------------------|---------------------------|
| Winter 2017/18                   | 1      | 30   | 6.08                  | 84.17                      | 133.60                    |
|                                  | 2      | 30   | 7.08                  | 86.93                      | 149.00                    |
|                                  | 3      | 16   | 6.30                  | 81.94                      | 15.80                     |
| Winter 2017/18 totals            |        | 76   | 6.52                  | 84.79                      | 298.40                    |
| Winter 2018/19                   | 1      | 30   | 9.06                  | 86.73                      | 81.40                     |
|                                  | 2      | 30   | 4.76                  | 86.10                      | 46.40                     |
|                                  | 3      | 44   | 7.20                  | 80.14                      | 181.80                    |
| Winter 2018/19 totals            |        | 104  | 7.04                  | 83.76                      | 309.60                    |
| <b>Winter totals (all years)</b> |        |      | <b>6.78</b>           | <b>84.27</b>               | <b>304.00</b>             |
| Spring 2018                      | 1      | 30   | 6.22                  | 76.93                      | 158.60                    |
|                                  | 2      | 30   | 8.66                  | 76.20                      | 214.40                    |
|                                  | 3      | 39   | 13.49                 | 67.85                      | 55.20                     |
| Spring 2018 totals               |        | 99   | 9.83                  | 73.13                      | 428.20                    |
| Spring 2019                      | 1      | 30   | 11.13                 | 63.63                      | 35.60                     |
|                                  | 2      | 30   | 11.15                 | 71.63                      | 148.40                    |
|                                  | 3      | 24   | 15.72                 | 63.17                      | 21.80                     |
| Spring 2019 totals               |        | 84   | 12.45                 | 66.36                      | 205.80                    |
| <b>Spring totals (all years)</b> |        |      | <b>11.14</b>          | <b>69.74</b>               | <b>317.00</b>             |

**Figure S1.** Rarefaction curve values for each sample in each Denomination of Origin.

**Figure S2.** Relative abundance of different fungal phyla **(a)**, orders **(b)** and families **(c)** detected across Denominations of Origin.

**Figure S3.** Boxplot illustrating the differences in Chao1 and Shannon diversity measures of the fungal communities between vineyards in D.O. Ribeiro **(a)**, D.O. Rías Baixas **(b)**, and Valdeorras **(c)**.

**Figure S4.** Boxplot illustrating the differences in Chao1 and Shannon diversity measures of the fungal communities between years in D.O. Ribeiro **(a)**, D.O. Rías Baixas **(b)**, and Valdeorras **(c)**.

**Figure S5.** Boxplot illustrating the differences in Chao1 and Shannon diversity measures of the fungal communities among sampling times in D.O. Ribeiro **(a)**, D.O. Rías Baixas **(b)**, and Valdeorras **(c)**.

**Figure S6.** Principal Coordinate Analysis (PCoA) based on Bray Curtis dissimilarity metrics showing the distance in the fungal communities among sampling times D.O. Ribeiro **(a)**, D.O. Rías Baixas **(b)**, and Valdeorras **(c)**.

**Figure S7.** Boxplot illustrating the differences in Chao1 **(a)** and Shannon **(b)** diversity measures of the grapevine trunk disease pathogens among Denominations of Origin.

**Figure S8.** Distribution of the relative abundance of fungal trunk diseases genera obtained by high-throughput amplicon sequencing in the annual shoot (sampling in November: initial microbiome) in the three Denominations of Origin.

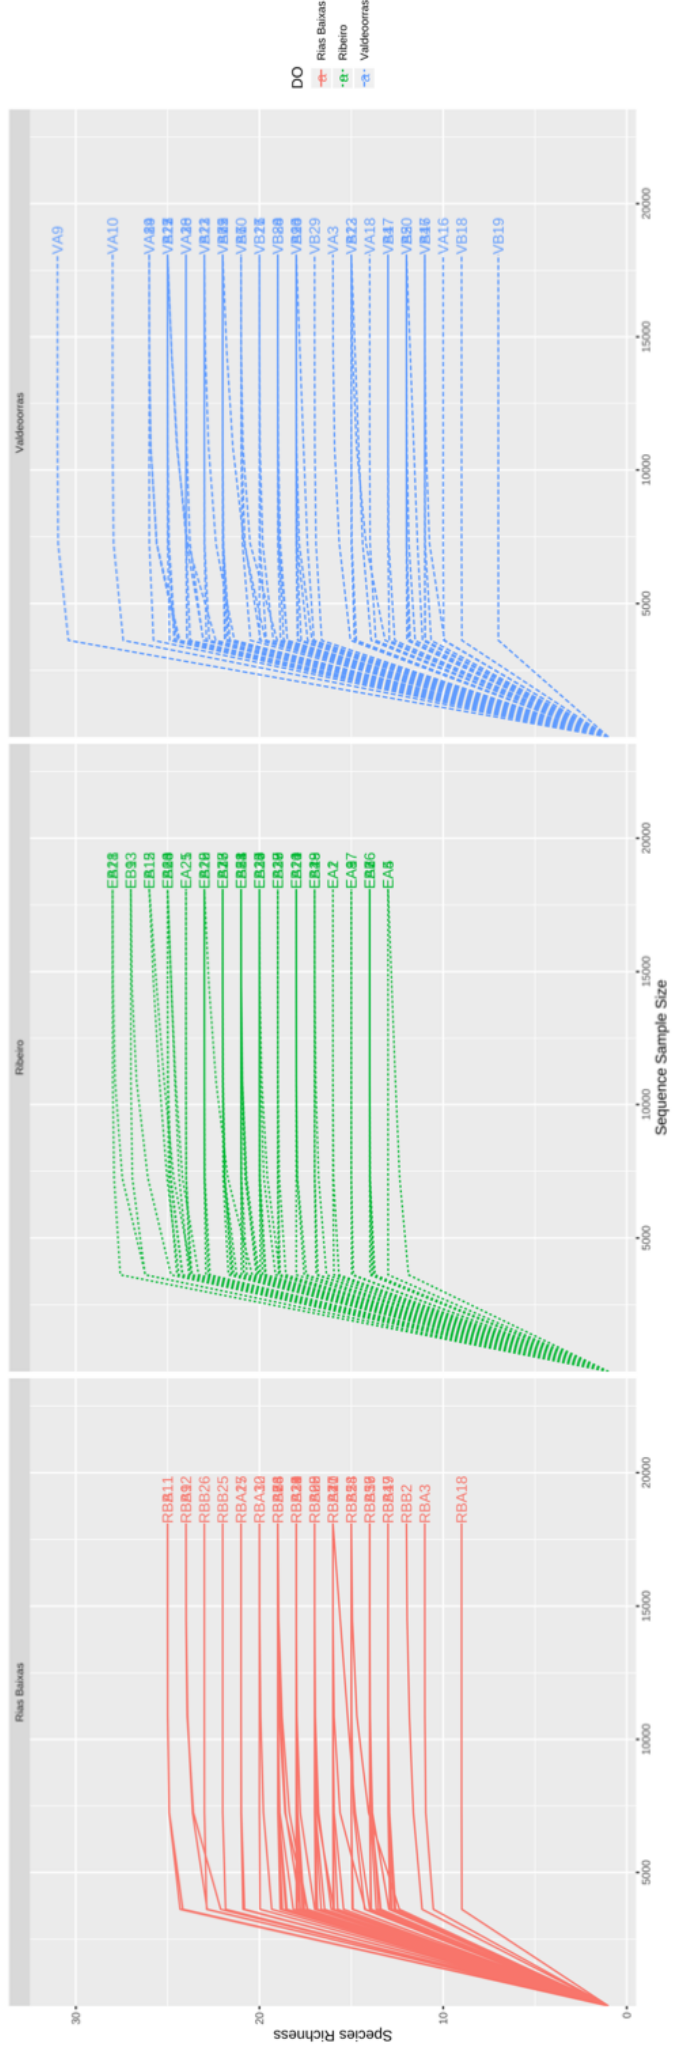

Rios Baixos

Ribeiro

Valdecoornas

Sequence Sample Size

Species Richness

DO



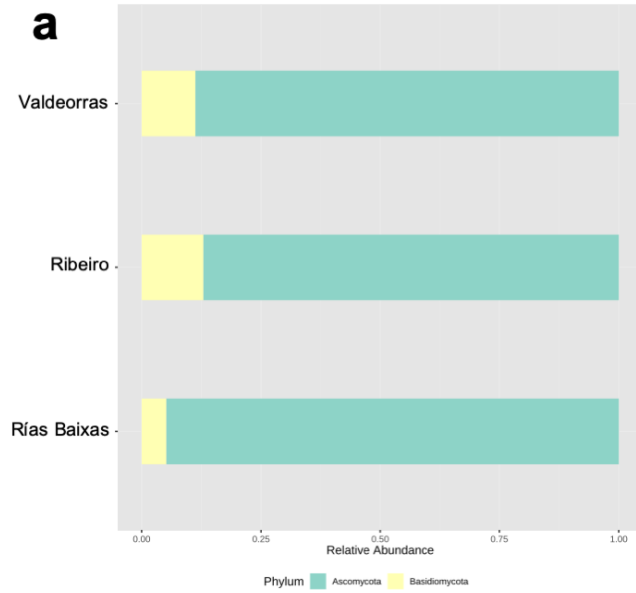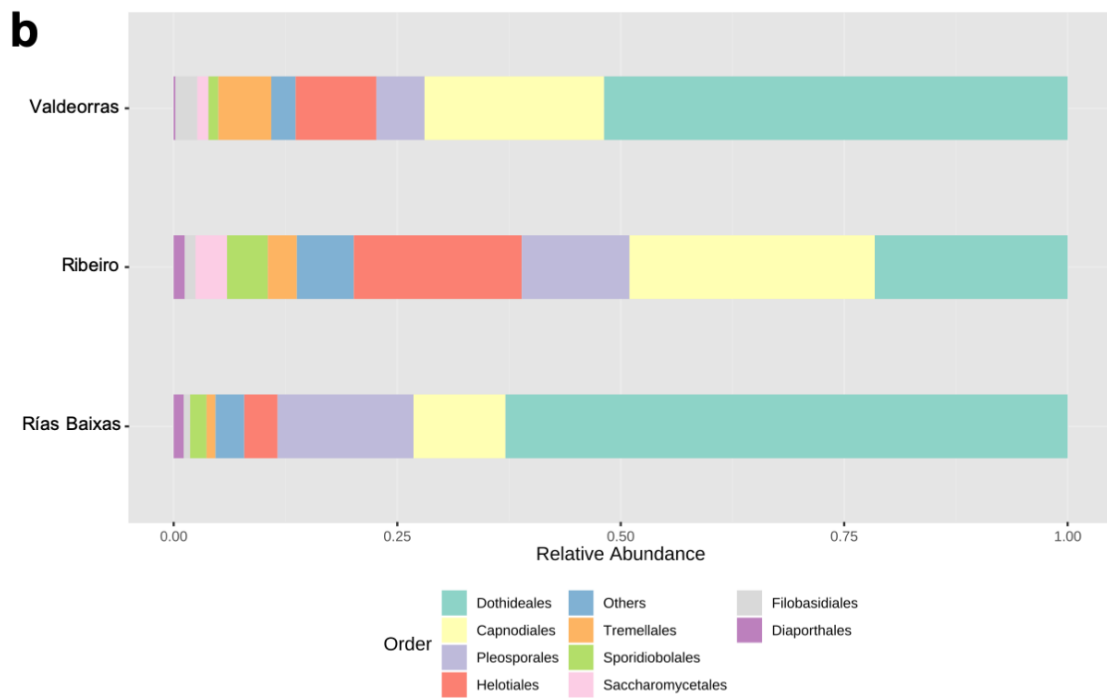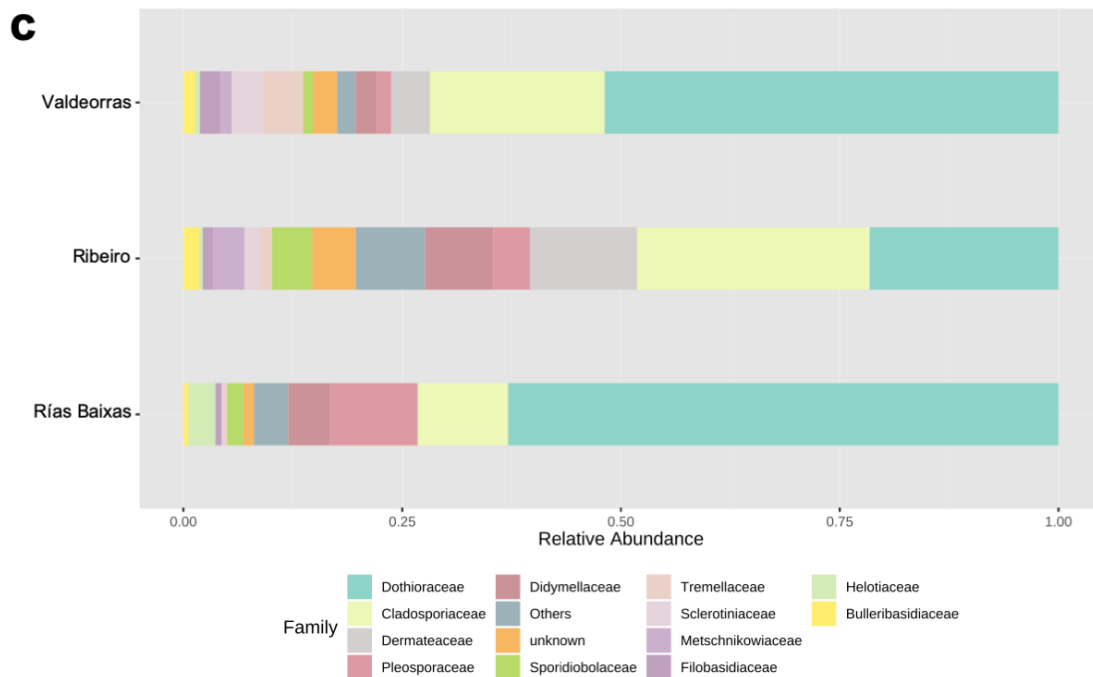

**a**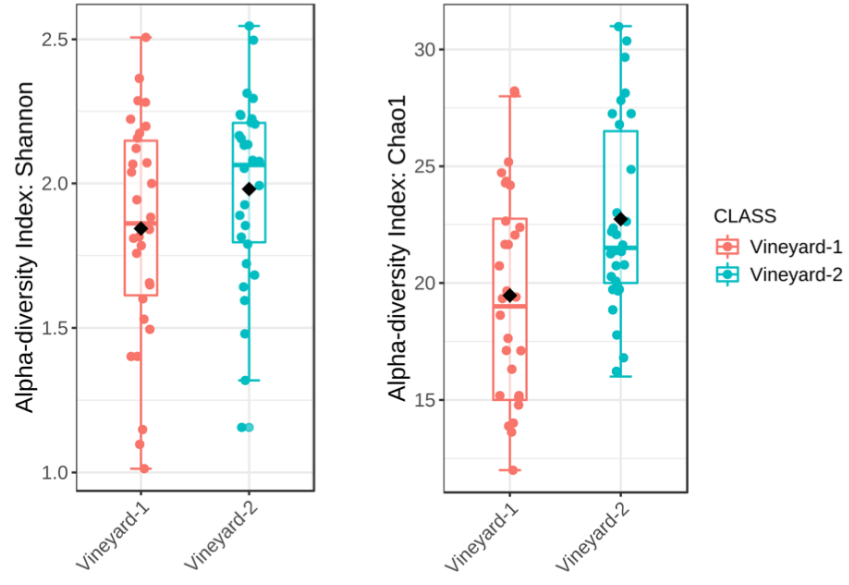**b**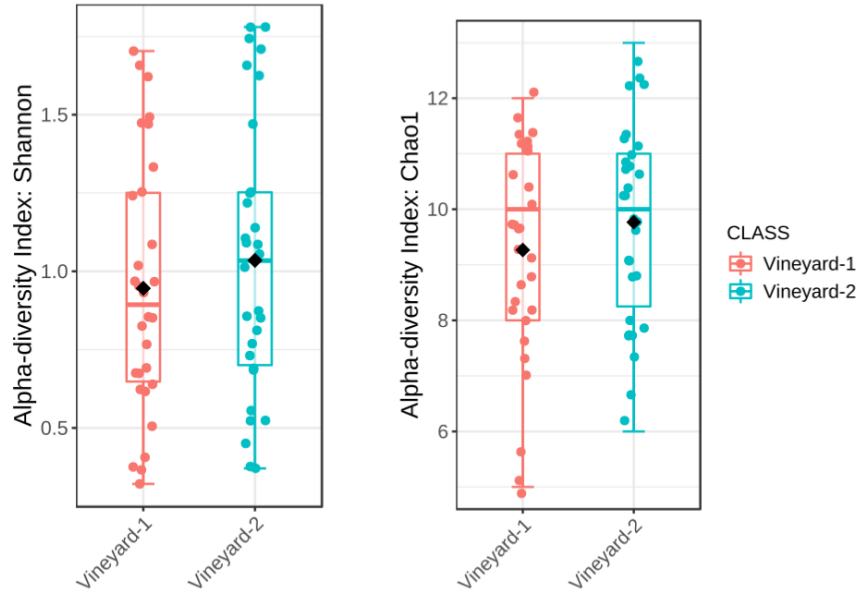**c**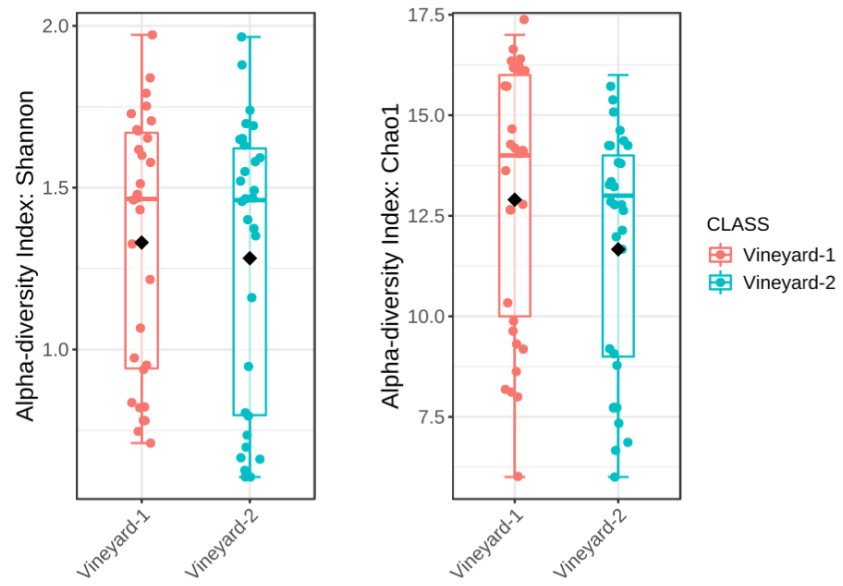

**a**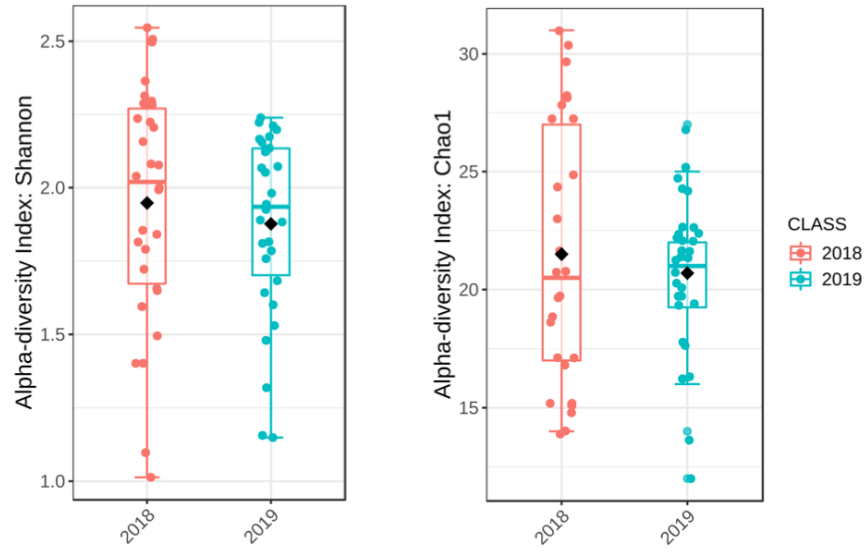**b**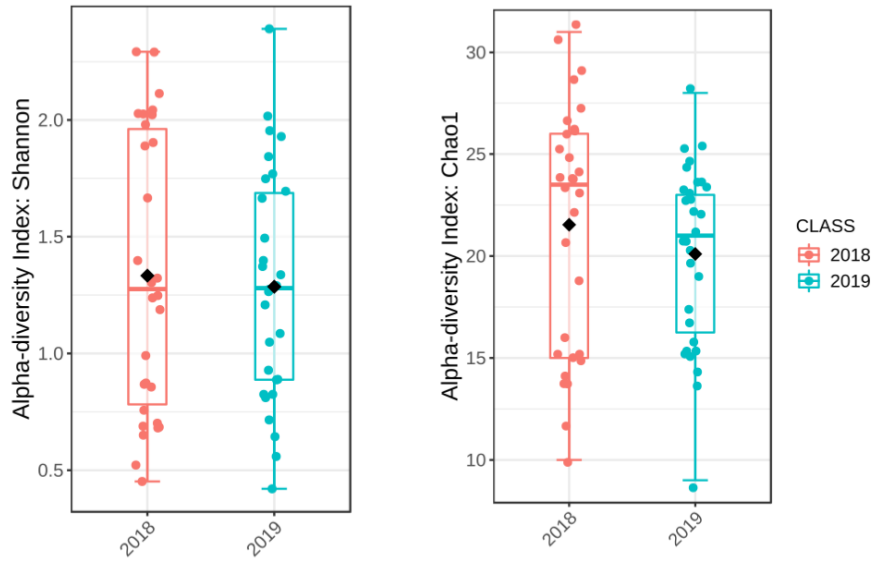**c**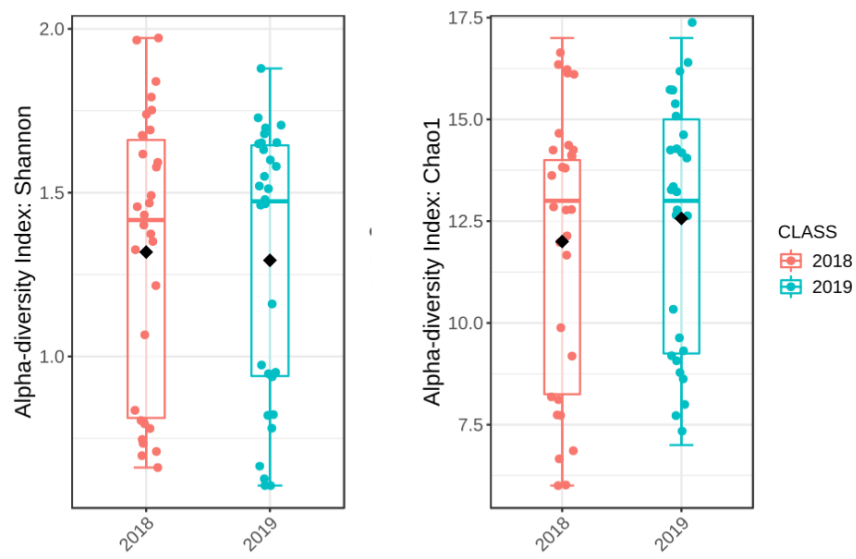

**a**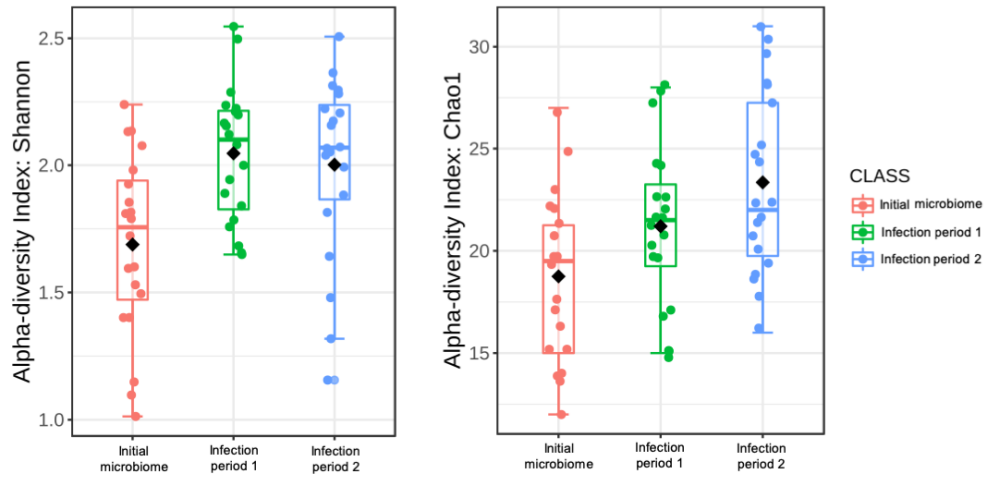**b**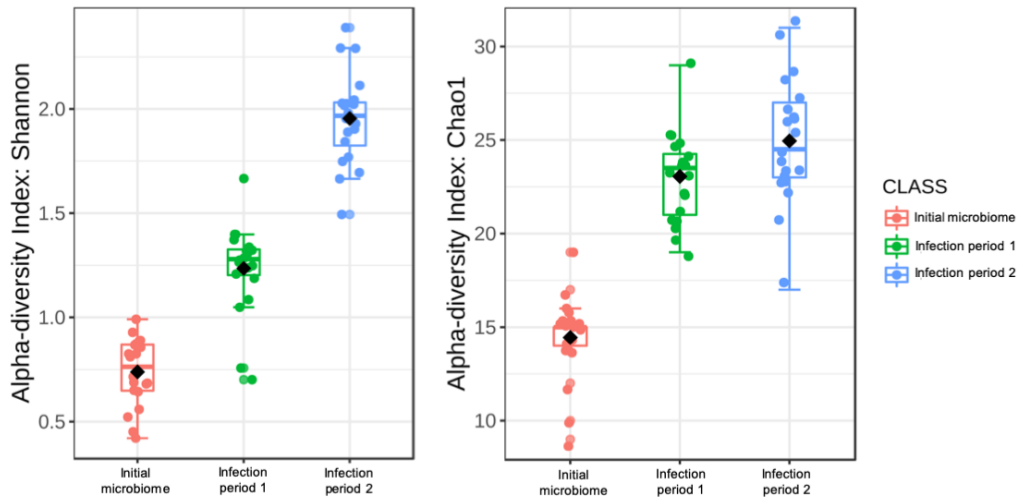**c**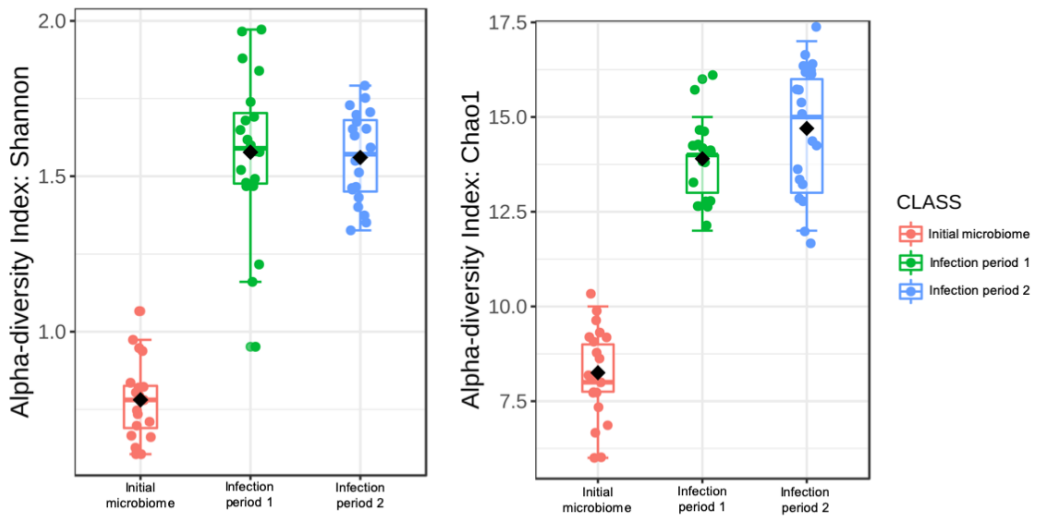

**a**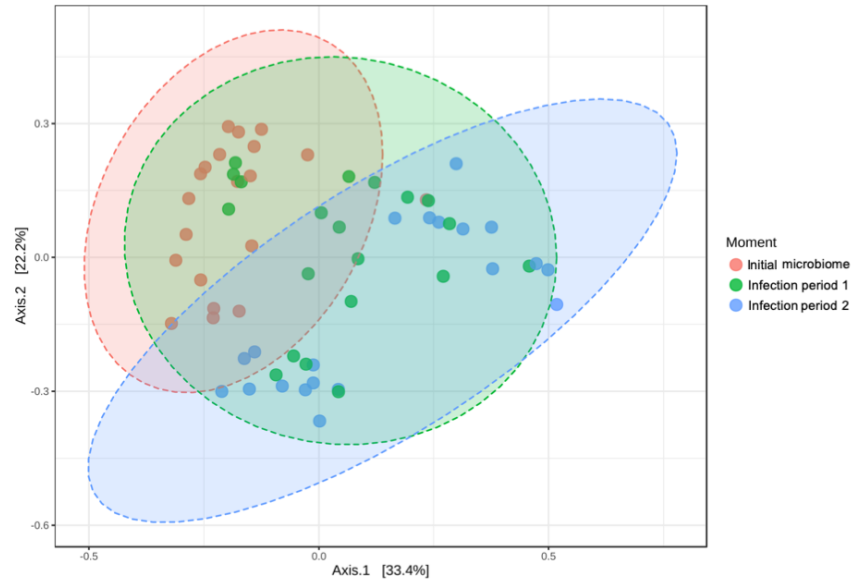**b**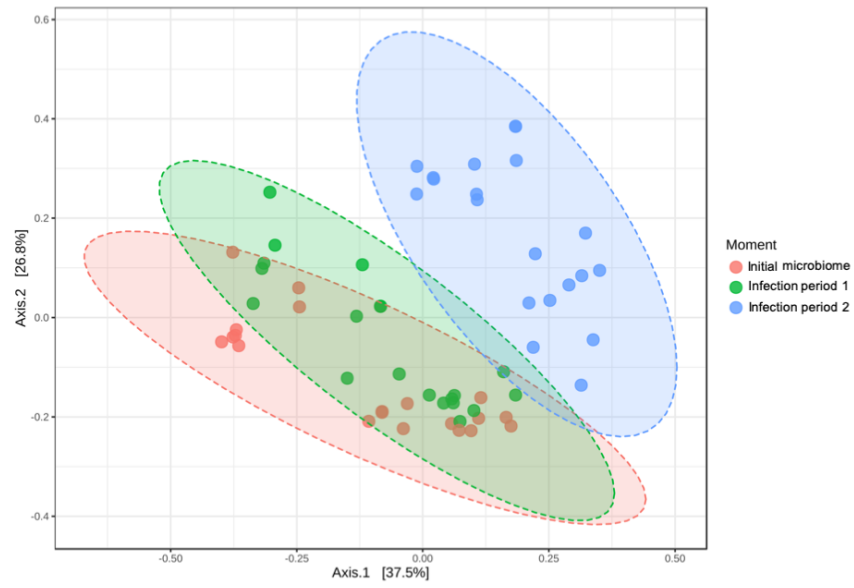**c**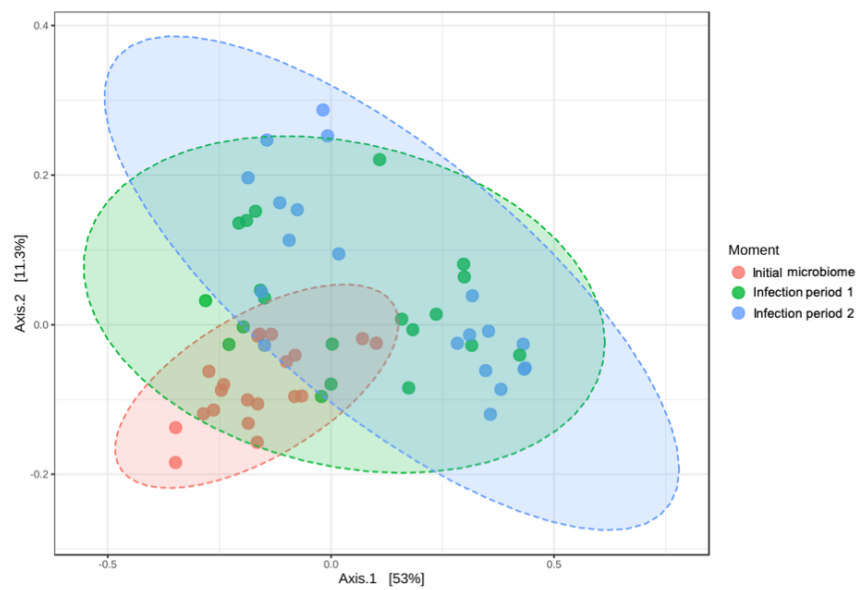

**a**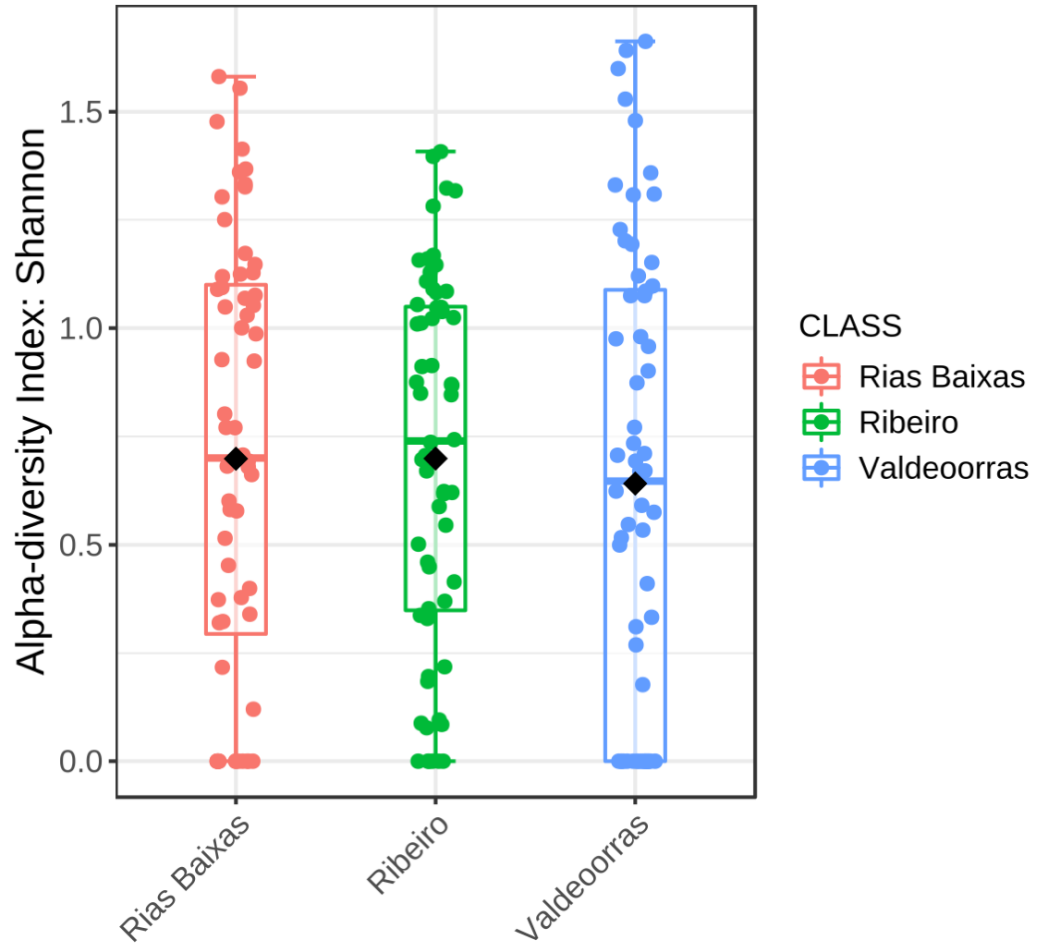**b**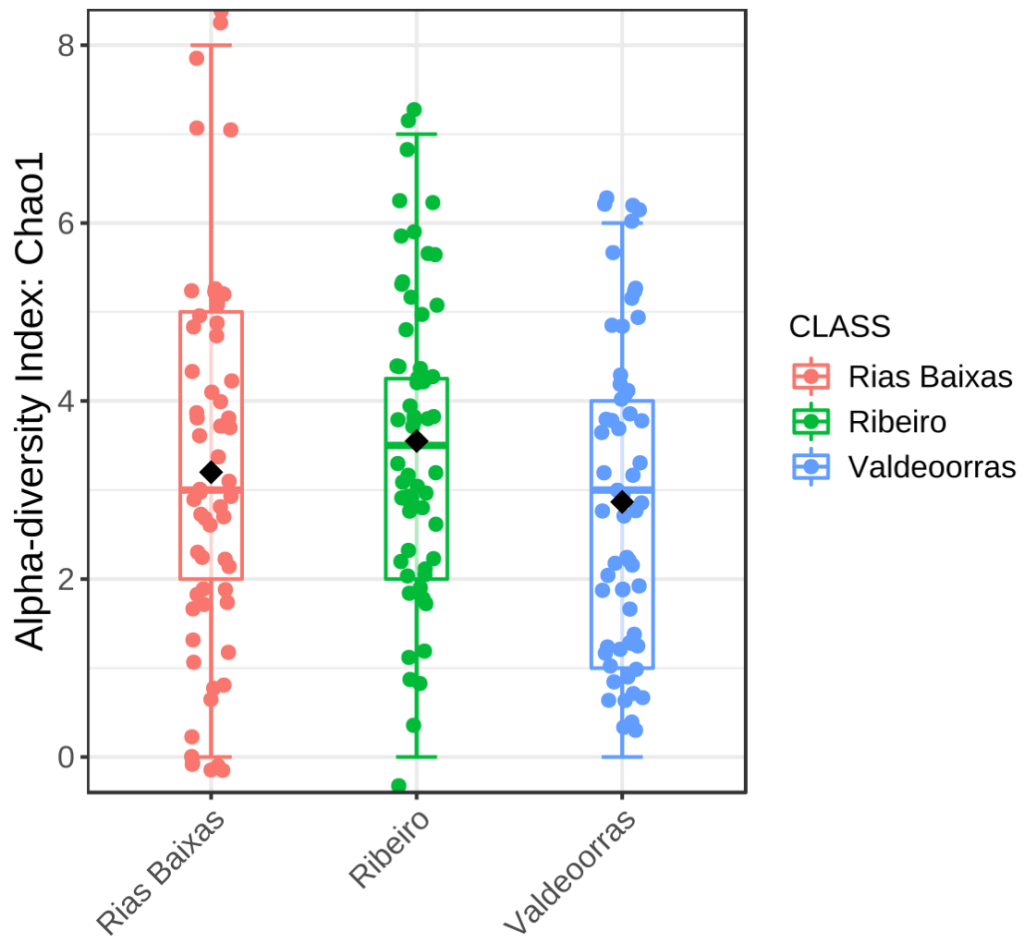

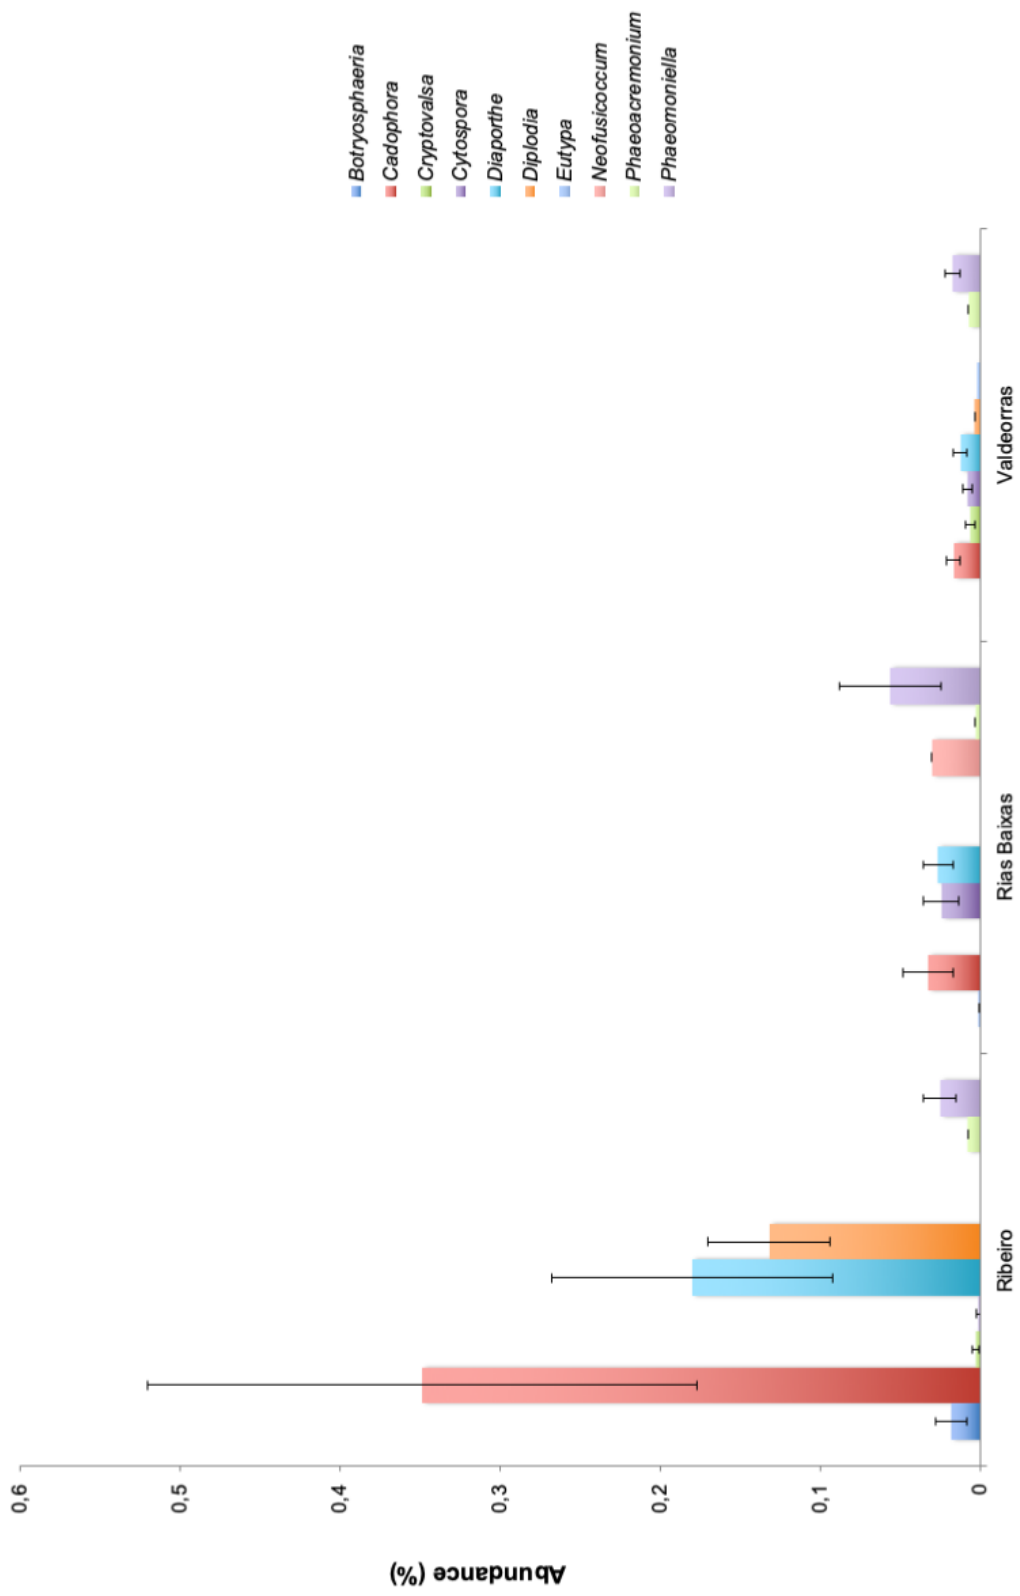

Supplement: Supplementary file [file media-1.pdf]
